# Supplementary material
Source: MDPI journal article supplement (https://www.mdpi.com/2073-4395/12/10/2421)
Supplement: s1 [file s1]

Supplementary Table S1. Means of the RL (root length), SL (Shoot length), RFW (root fresh weight), SFW (shoot fresh weight), RDW (root dry weight), and SDW (shoot dry weight) of **PI296968 (Triticum zhukovskyi)** and **Bolal 2973 (Triticum aestivum)** grown under Control (3.1  $\mu$ M B), and highly toxic B (10 mM B).

| Parameter                   | Shoot Length |        | Root Length |        | Shoot Fresh Weight |       | Root Fresh Weight |       | Shoot Dry Weight |       | Root Dry Weight |       |
|-----------------------------|--------------|--------|-------------|--------|--------------------|-------|-------------------|-------|------------------|-------|-----------------|-------|
| Treatment/<br>Genotype      | Control      | TB     | Control     | TB     | Control            | TB    | Control           | TB    | Control          | TB    | Control         | TB    |
| PI296968<br>(T. zhukovskyi) | 33.000       | 32.667 | 23.667      | 10.500 | 0.377              | 0.337 | 0.140             | 0.110 | 0.041            | 0.051 | 0.010           | 0.009 |
| Bolal 2973<br>(T. aestivum) | 39.167       | 28.333 | 26.167      | 17.500 | 0.497              | 0.382 | 0.140             | 0.067 | 0.053            | 0.053 | 0.011           | 0.007 |
