# Supplementary material
Source: MDPI journal article supplement (https://www.mdpi.com/2073-4395/12/10/2421)
Supplement: s1 [file s1 › Supplementary Figures.pdf]

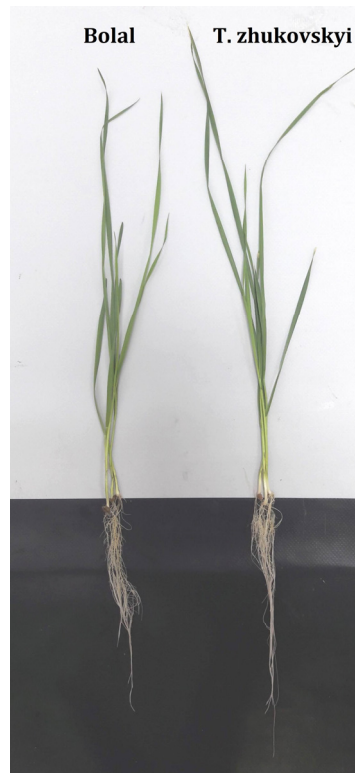

**Figure S1.** Pictures showing the plants of the two genotypes, Bolal 2973 and *T. zhukovskyi* (PI296968), grown in a hydroponic system under highly toxic B (10 mM B) just before the harvest (7th day after B treatment).

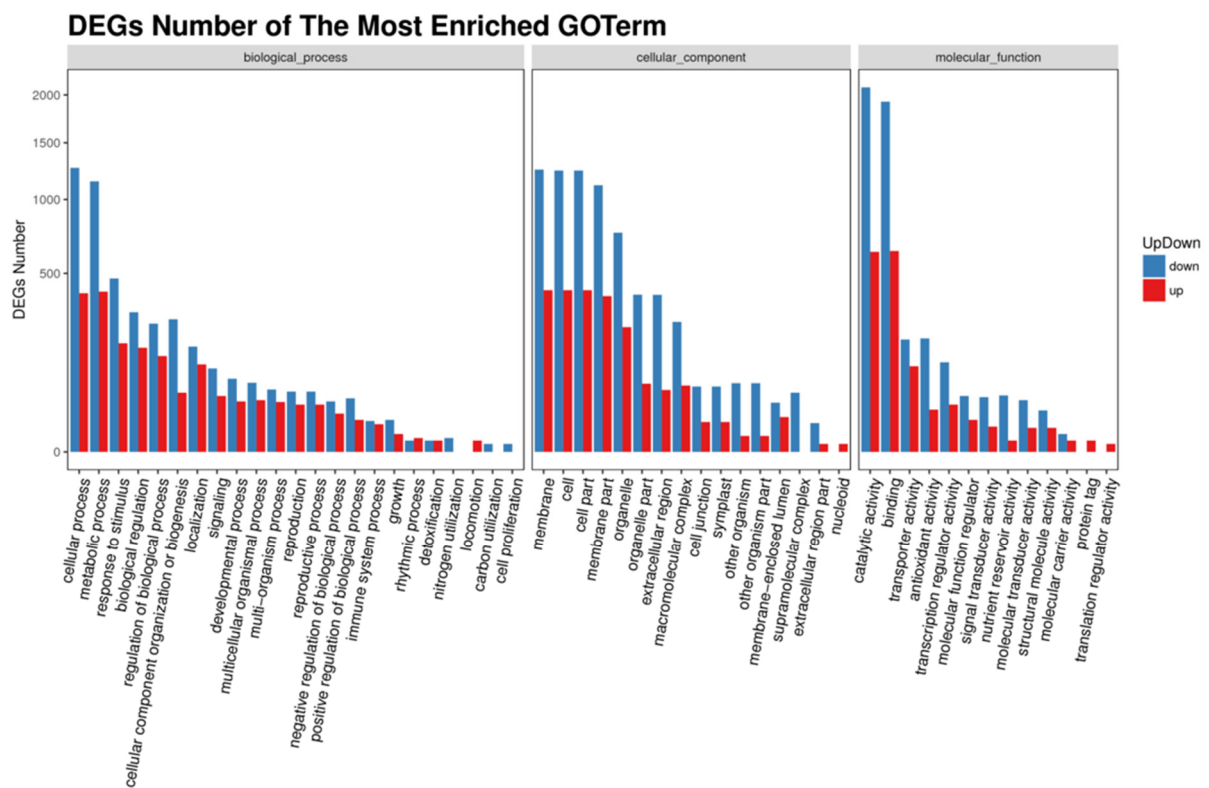

**Figure S2.** GO classification of up-regulated and down-regulated genes of roots of the *T. zhukovskyi* (Tz) genotype grown under highly toxic B (TB 10 mM) treatment relative to those grown in control (3.1  $\mu$ M B) treatment.

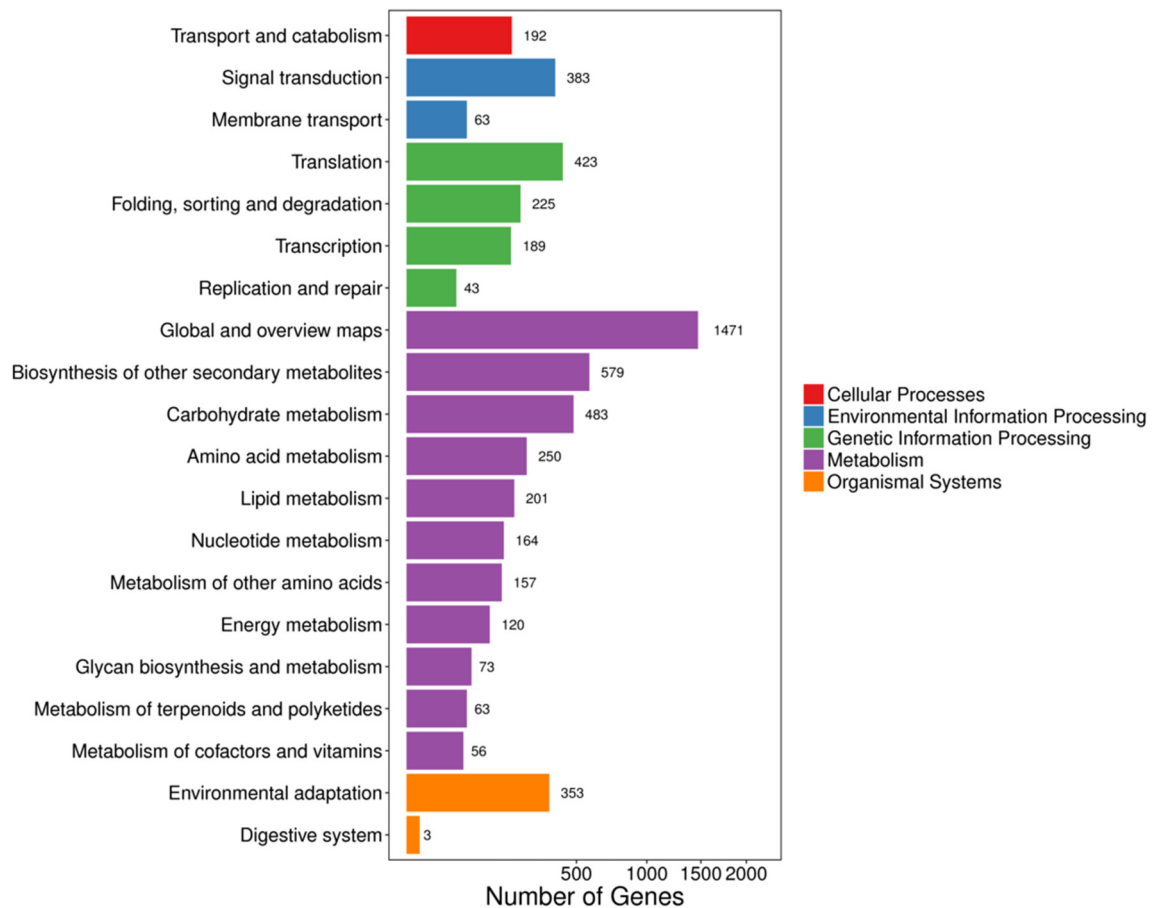

**Figure S3.** KEGG pathway classification of DEGs of roots of the *T. zhukovskyi* (Tz) genotype grown under highly toxic B (TB 10 mM) treatment relative to those grown in control (3.1  $\mu$ M B) treatment. X axis represents number of DEGs. Y axis represents functional classification of KEGG. There are five classes for KEGG pathways: Organismal Systems, Metabolism, Genetic Information Processing, Environmental Information Processing, and Cellular Processes
